# Supplementary material for: Processing of progranulin into granulins involves multiple lysosomal proteases and is affected in frontotemporal lobar degeneration
Source: PubMed Central journal article supplement (PMC8330050; doi:10.1186/s13024-021-00472-1), 2021-08-03

Figure S1 - Enzymes that do not cleave PGRN are active

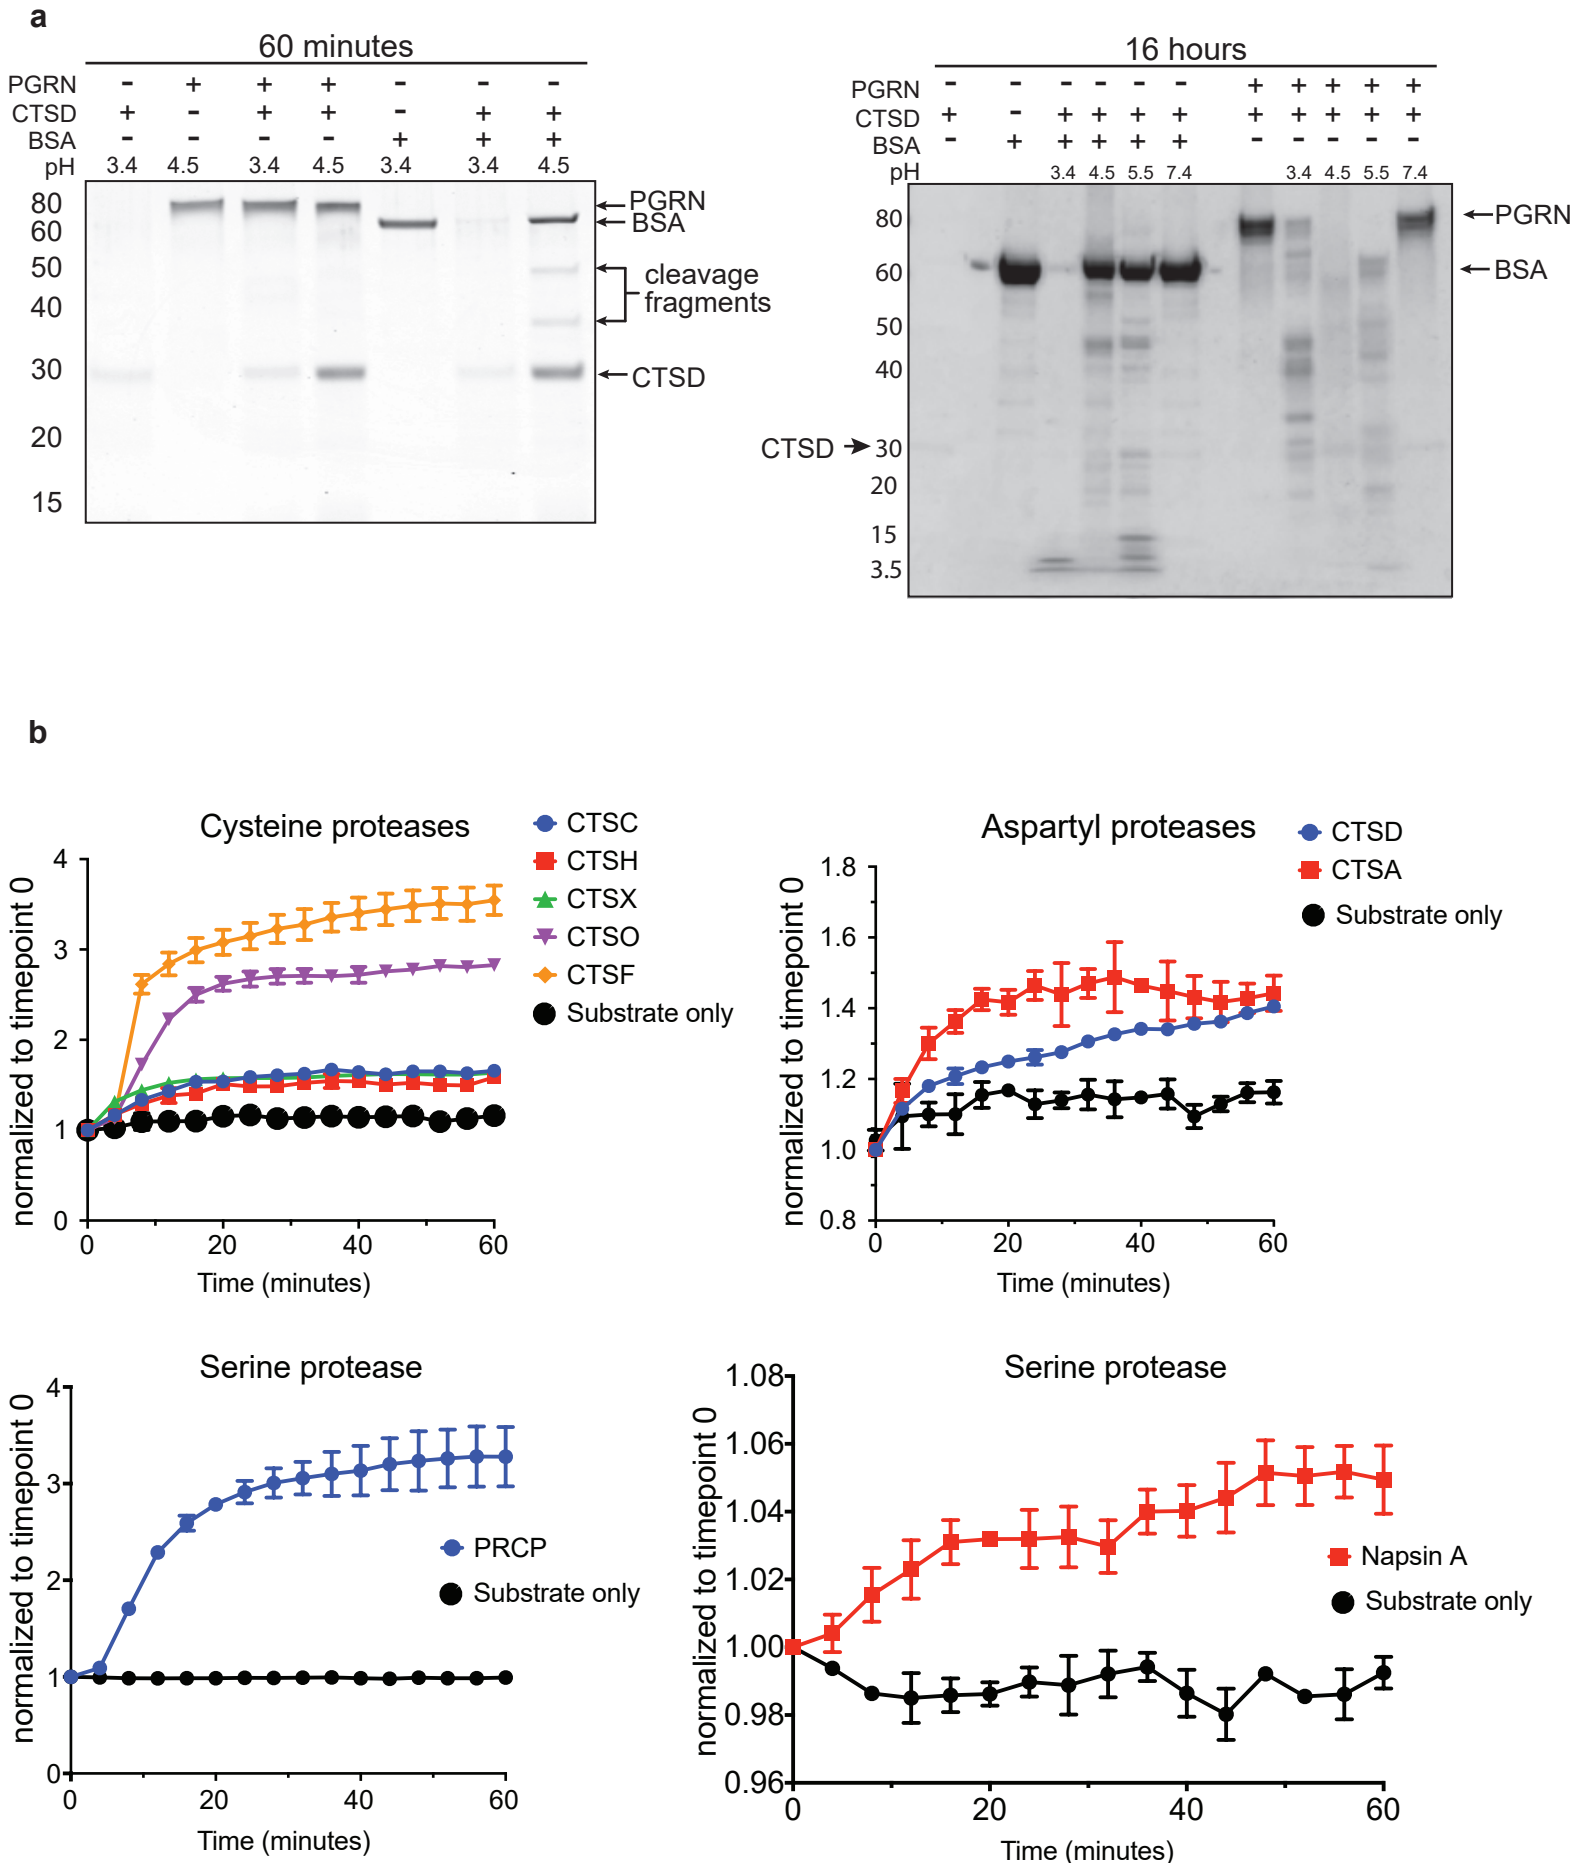

**Figure S2 - Antibody specificity to PGRN and individual granulins**

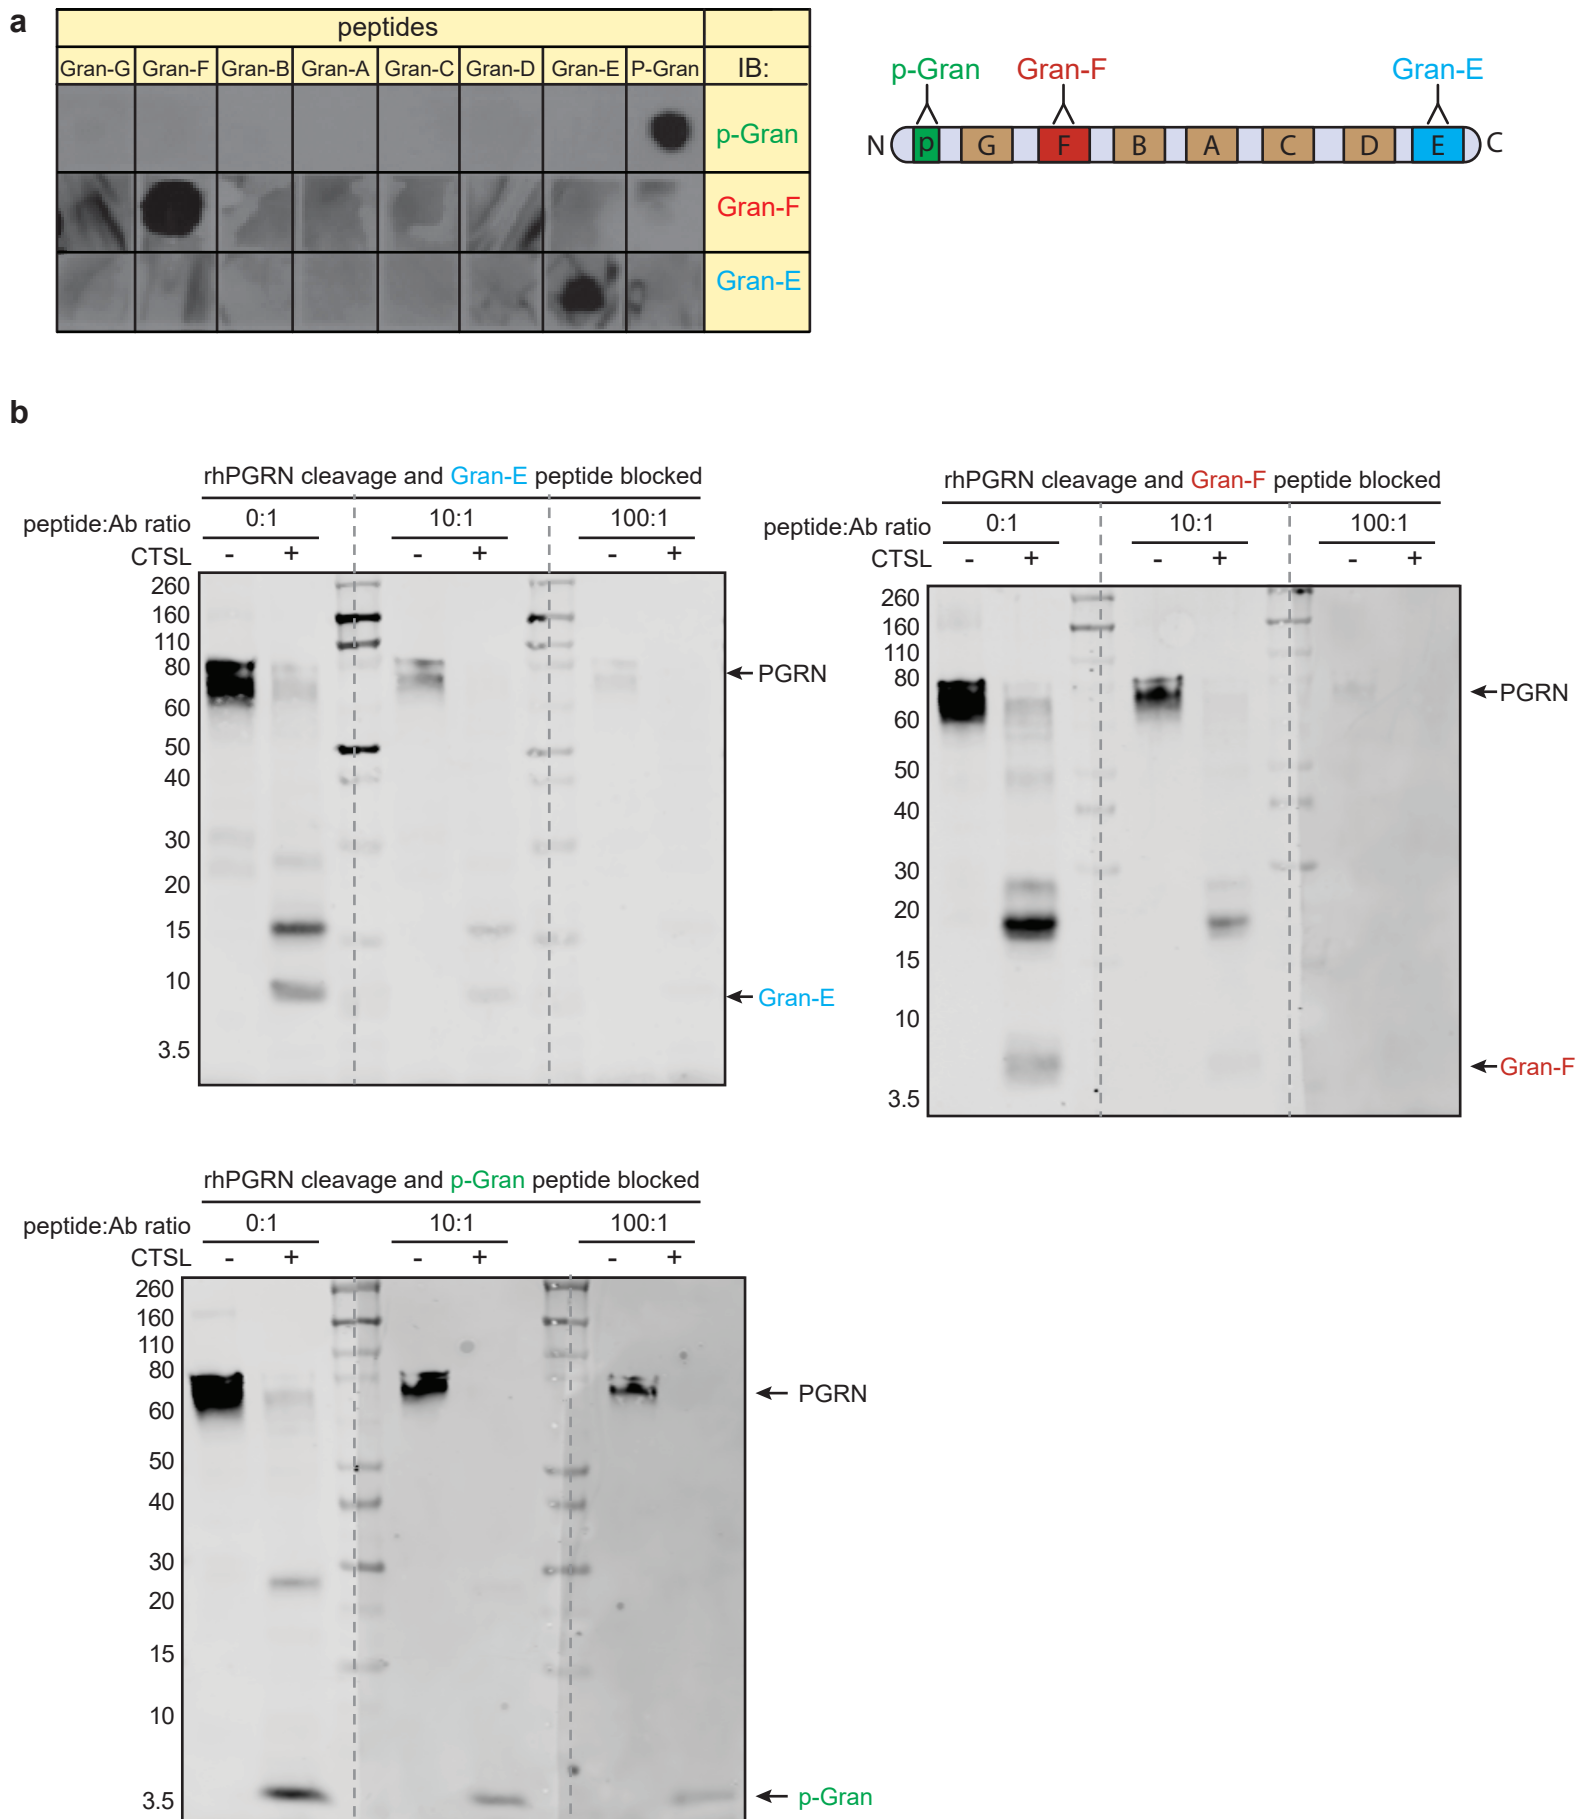

Figure S3 - Lysosomal proteases unable to digest PGRN *in vitro*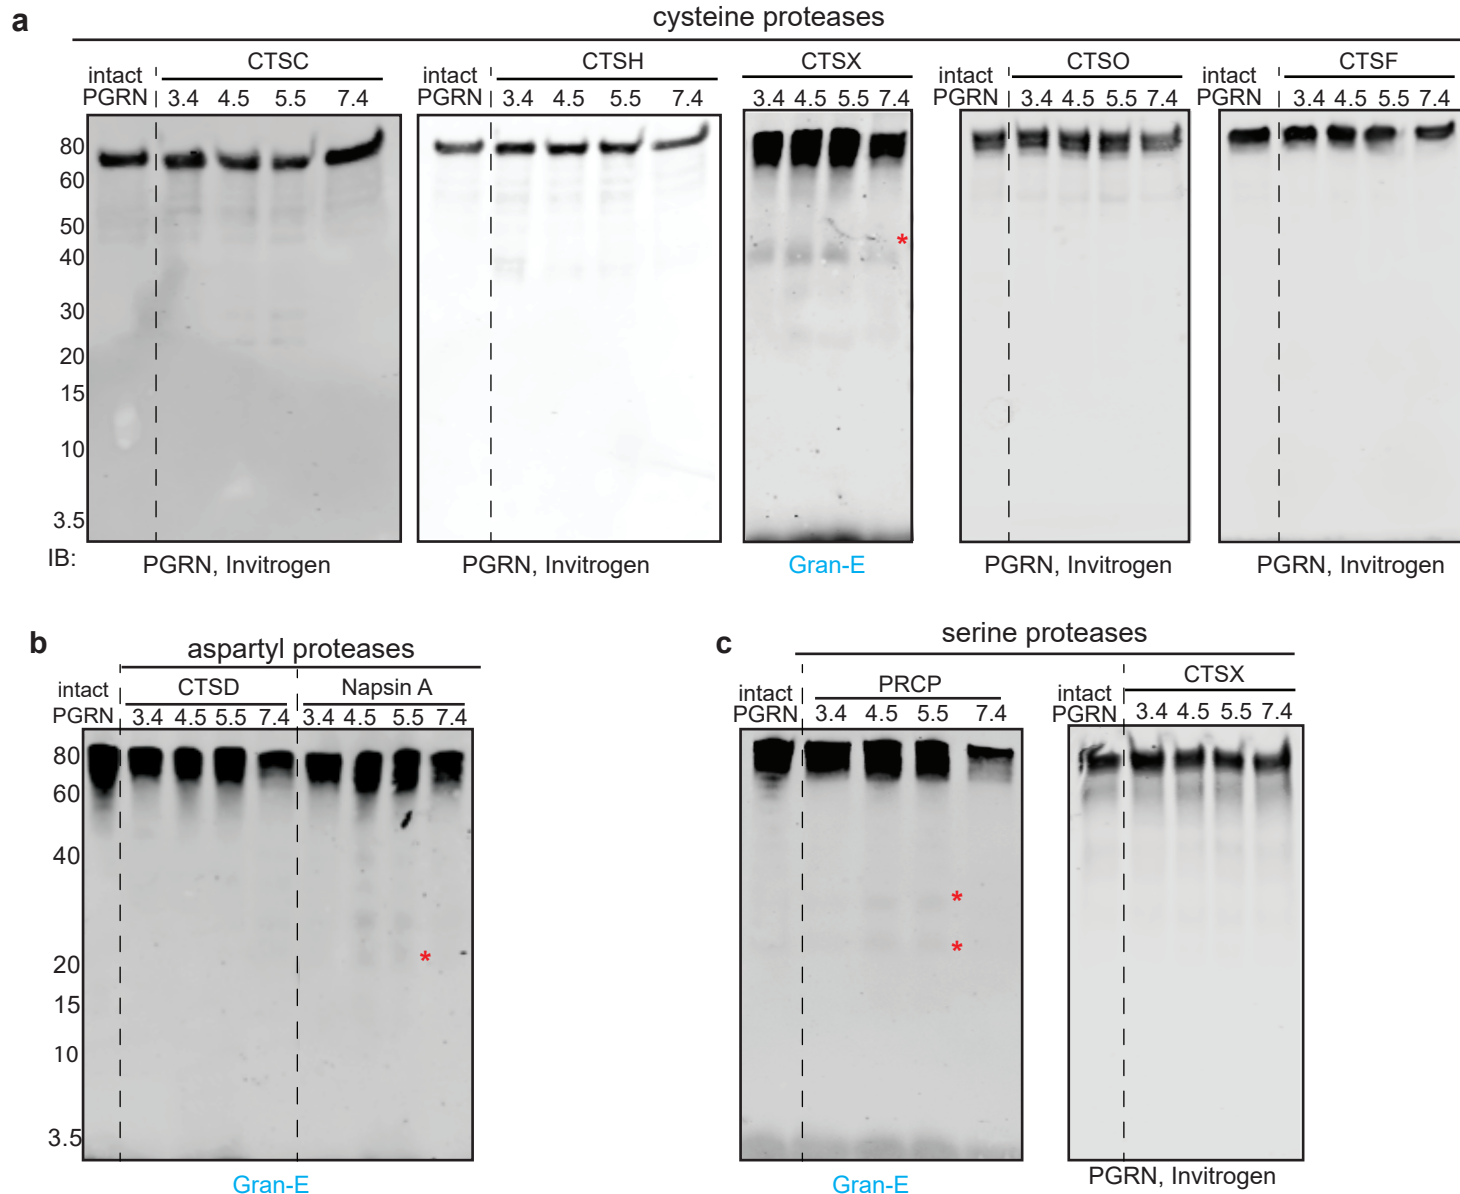

**Figure S4 - PGRN processing by lysosomal proteases *in vitro* at pH 6.5**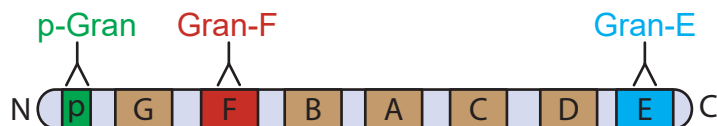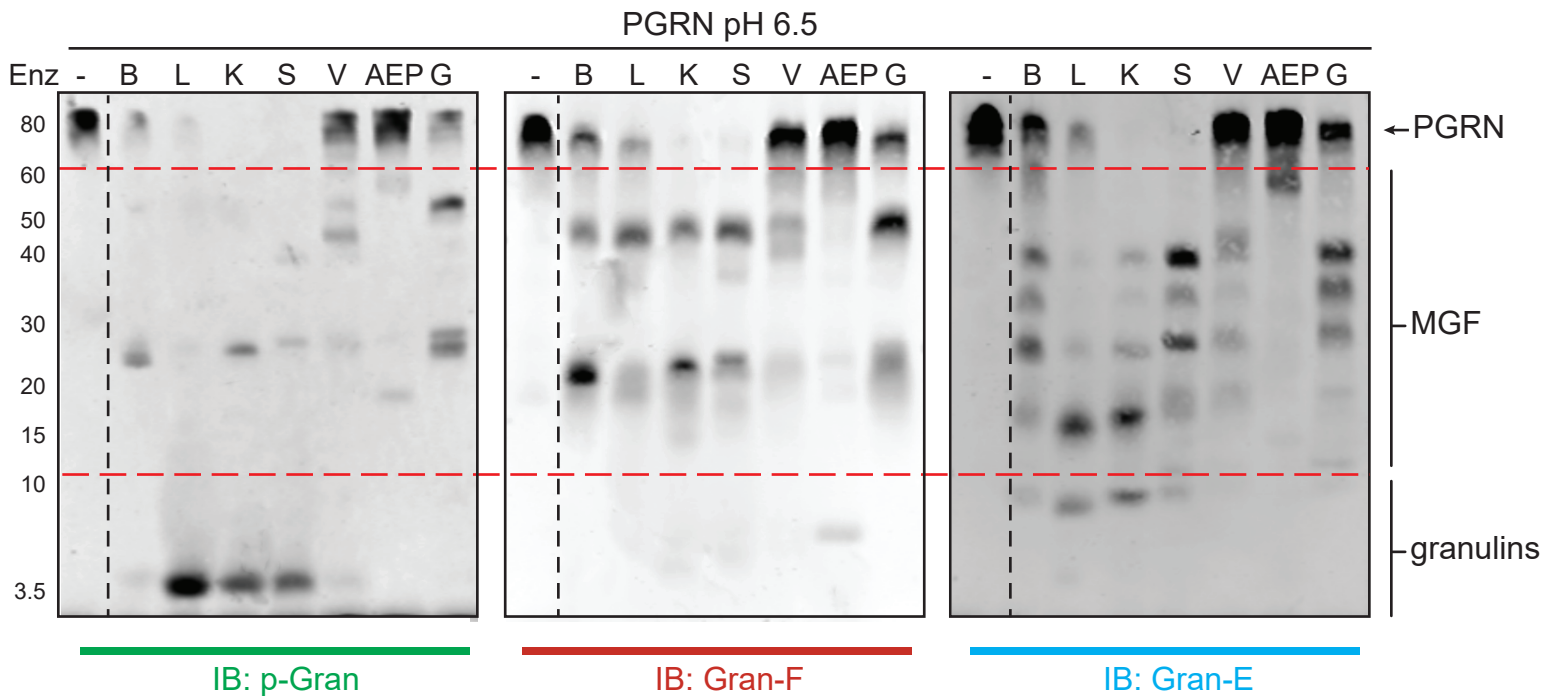

Figure S5 - Illustrative summary of PGRN processing into granulins by multiple proteases

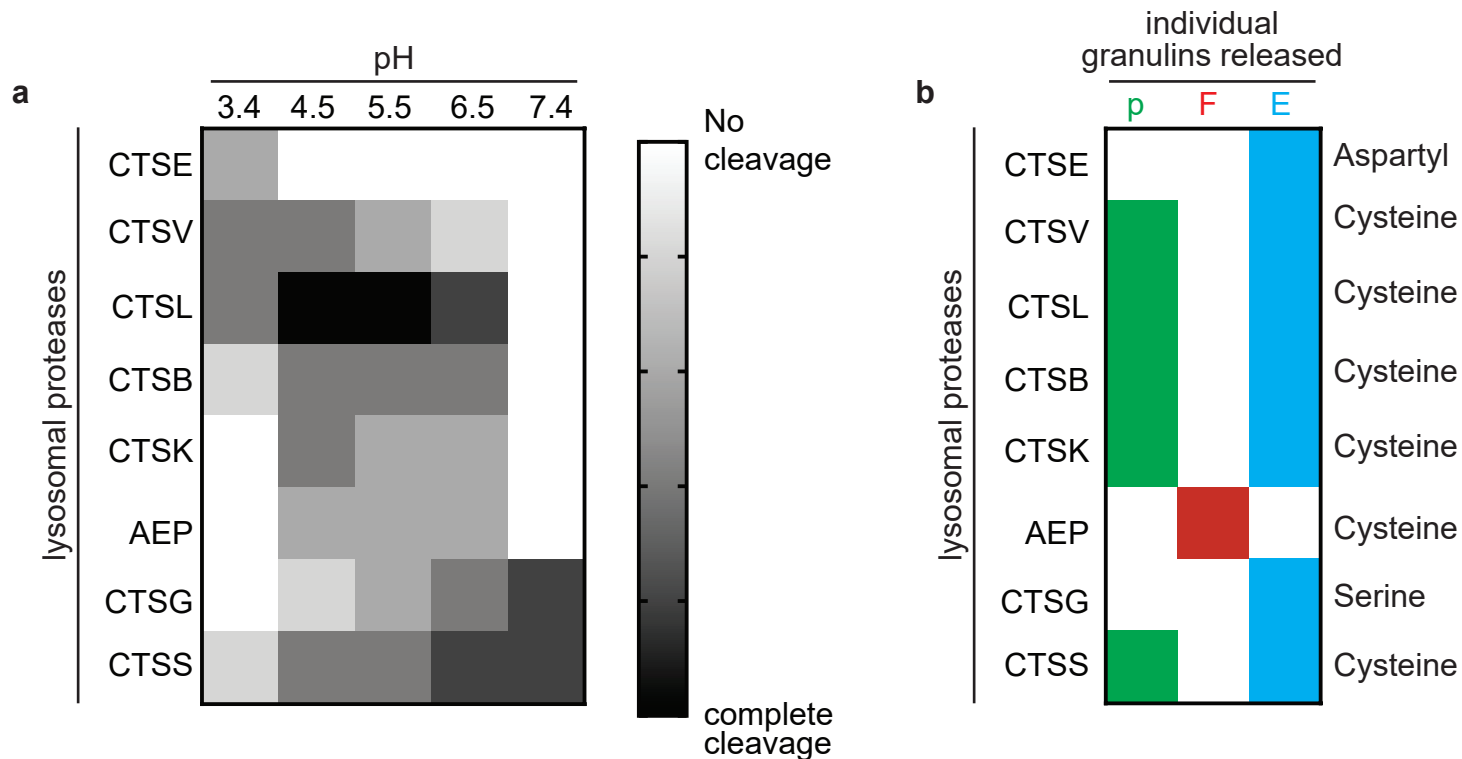

**Figure S6 - CTSL is highly efficient at liberating paraganulin and Gran-E from PGRN**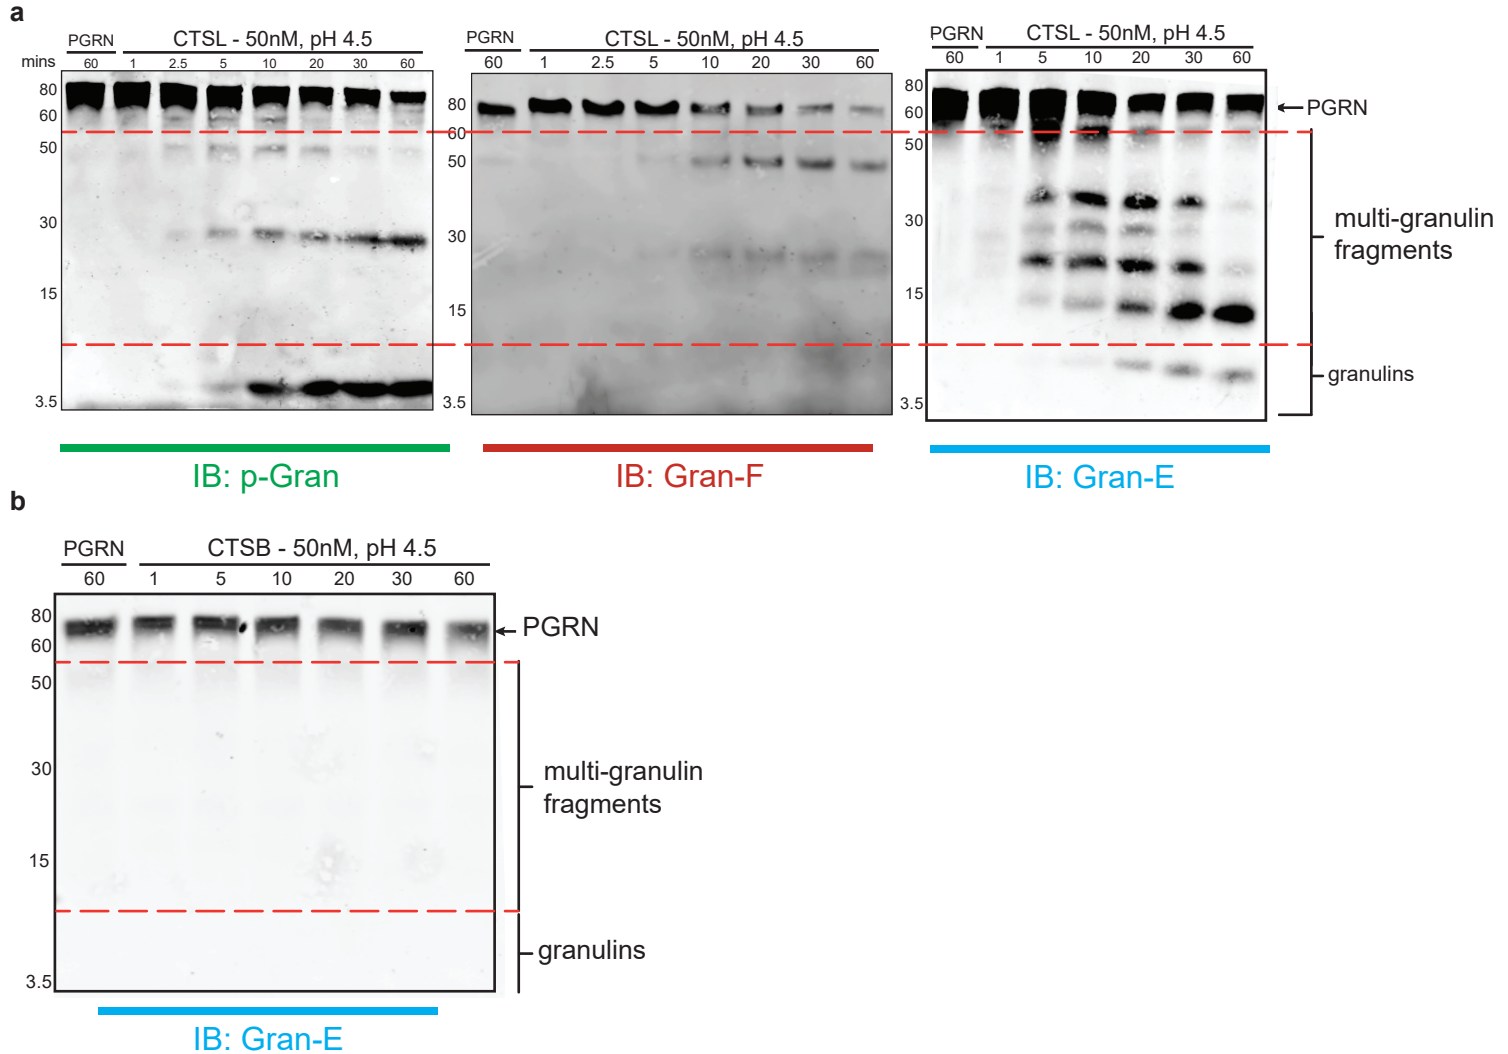

**Figure S7- Antibody specificity to detect both PGRN and granulin sized bands in iPSC lysates**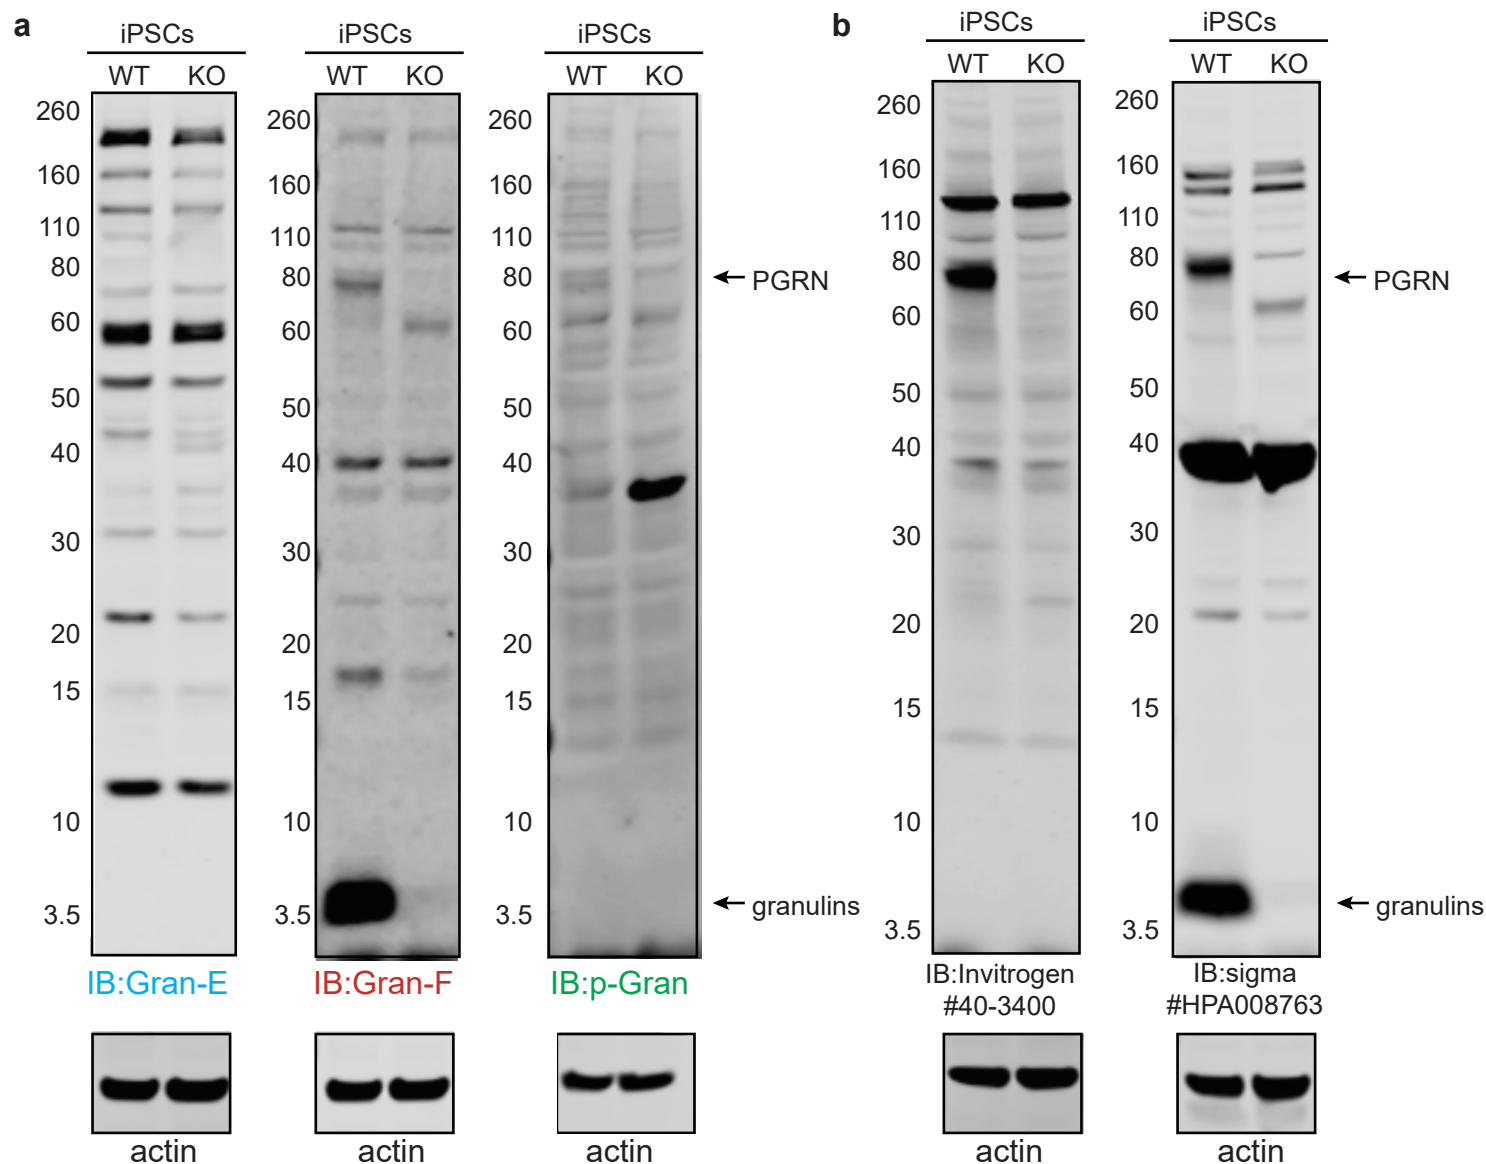

Figure S8 - Expression profile of lysosomal proteases in differentiated SH-SY5Y cells

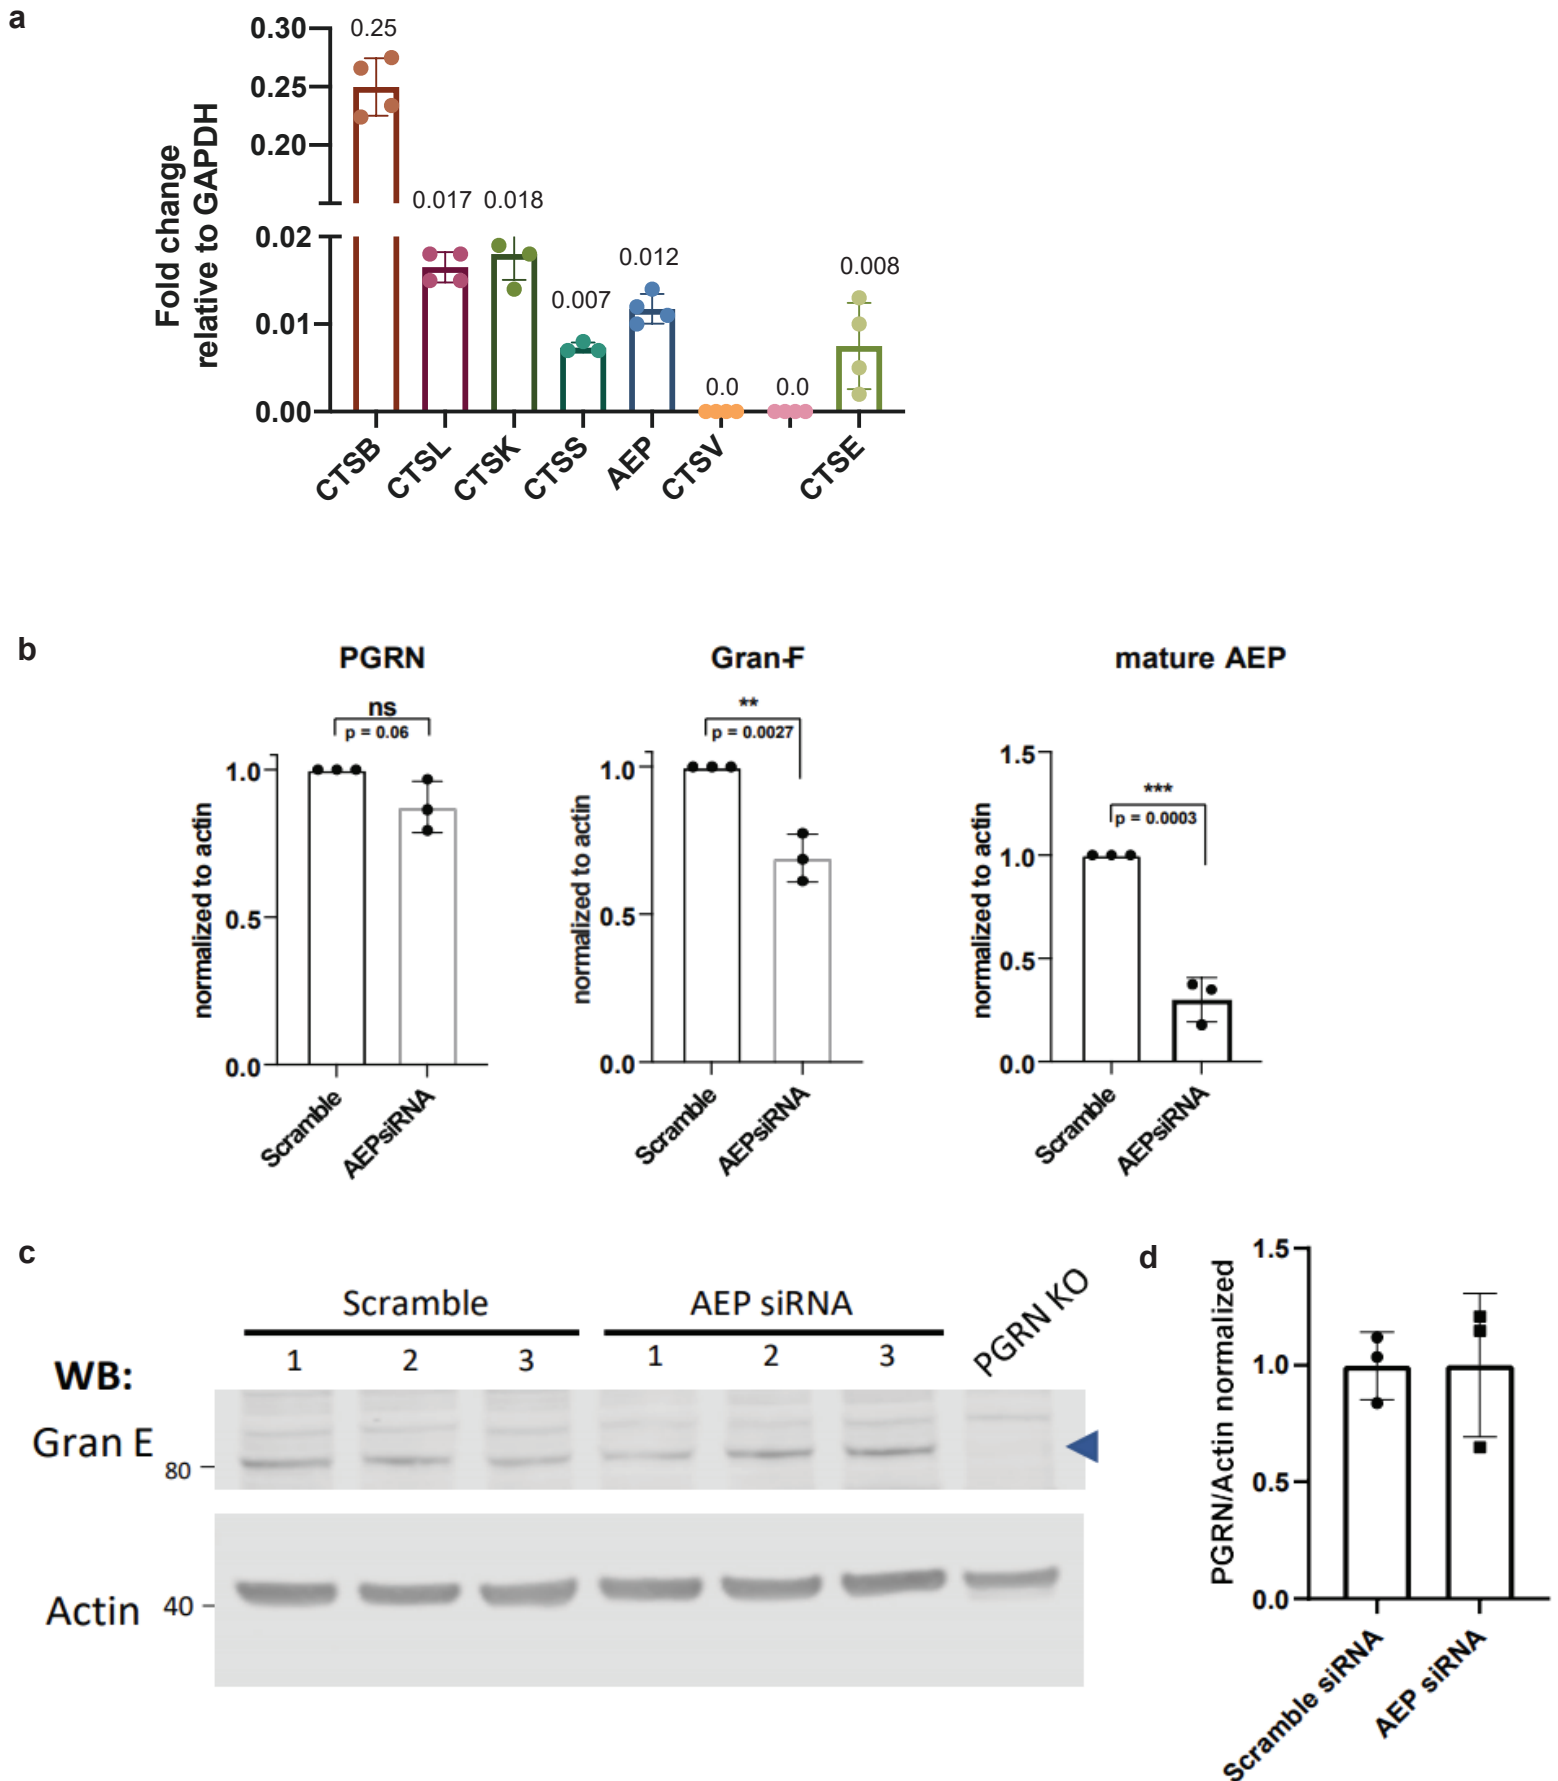



Figure S9 - PGRN is processed by AEP to liberate individual granulins F and B

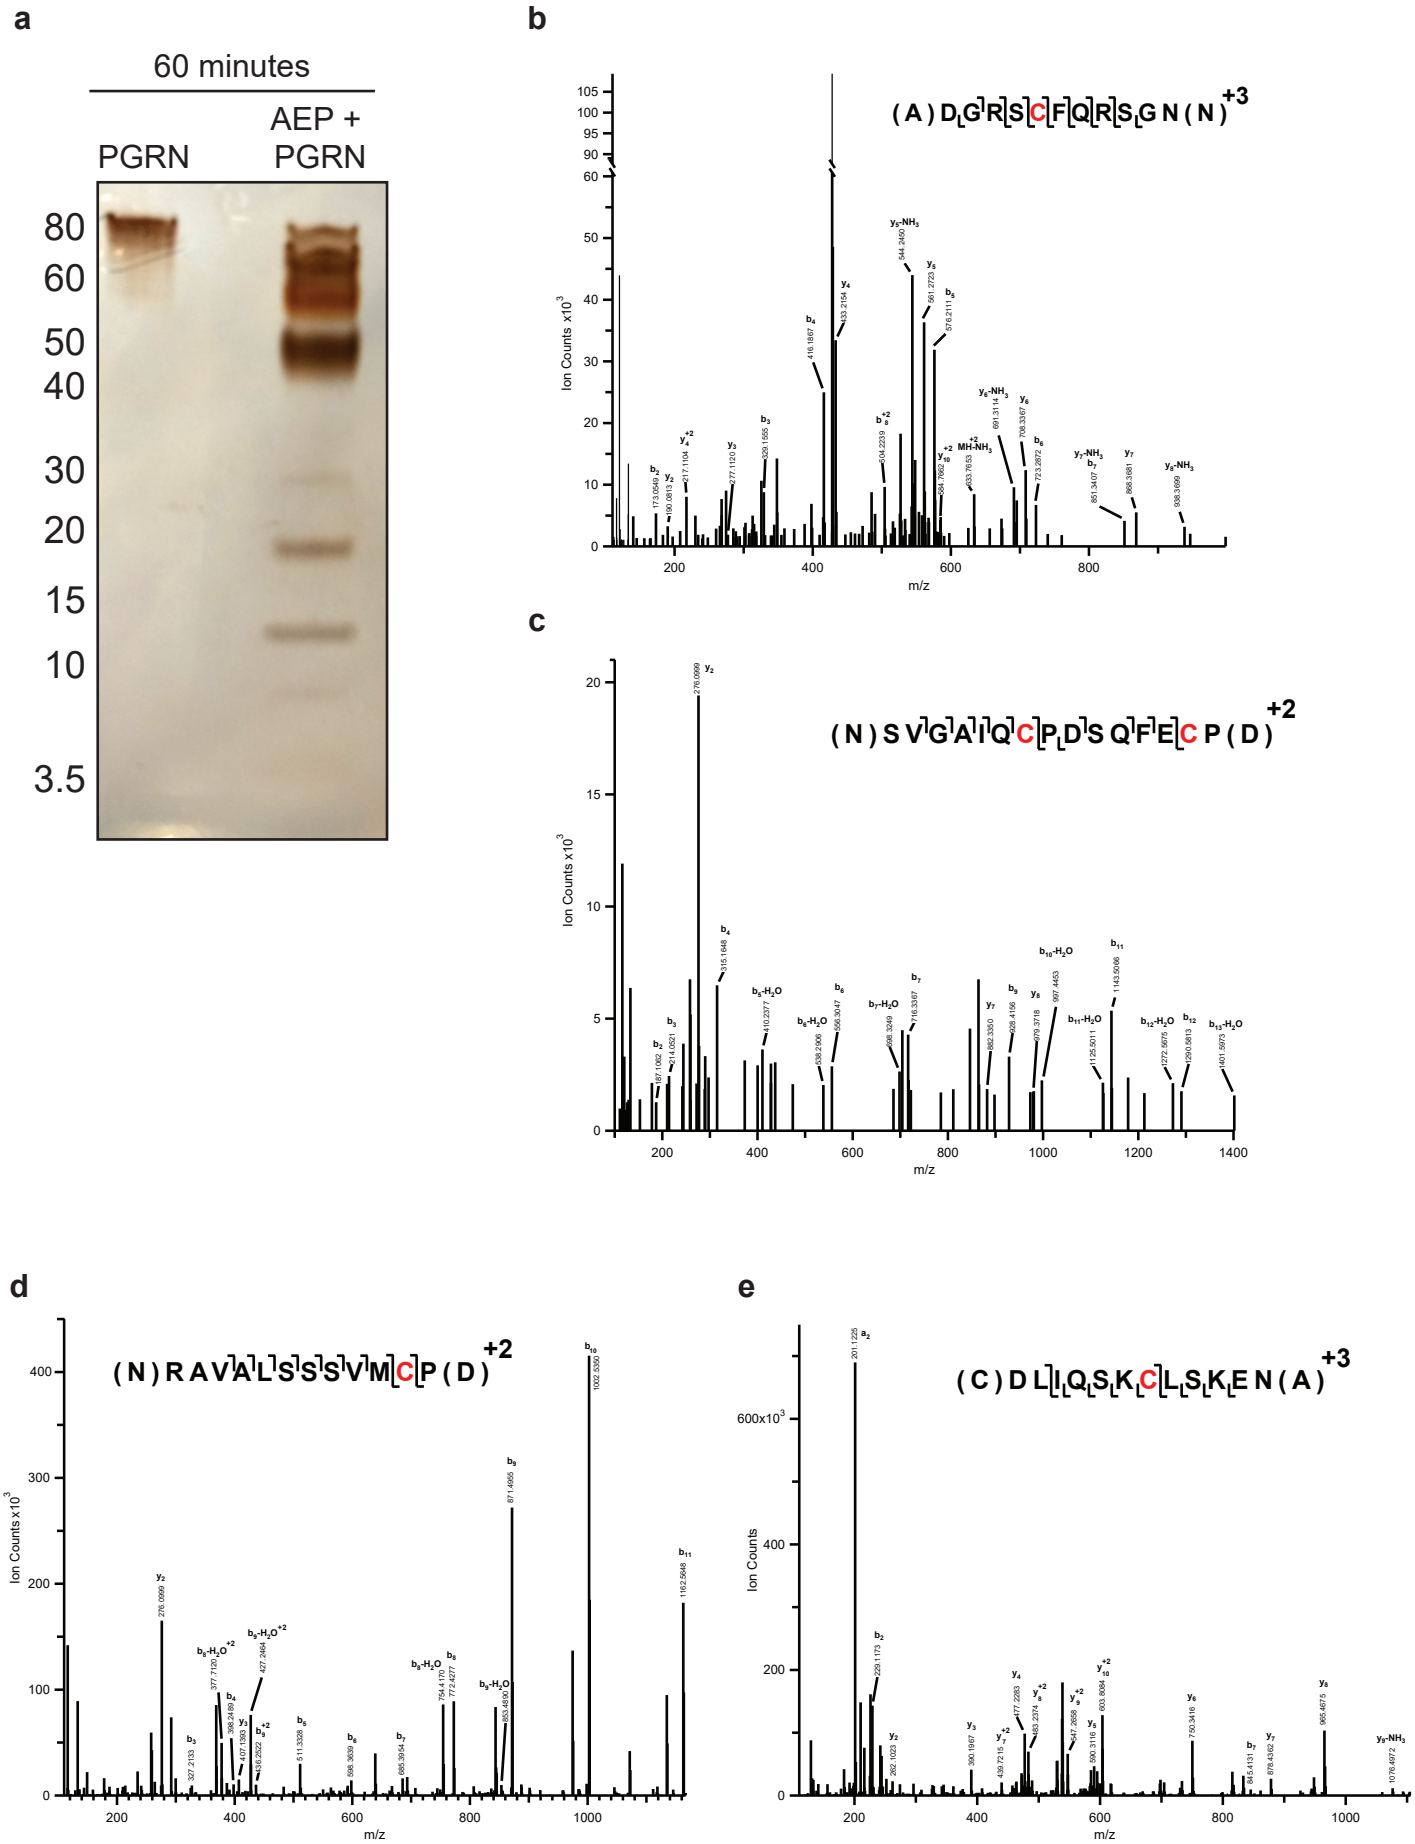

Figure S10 - Progranulin and granulin F levels in human brain

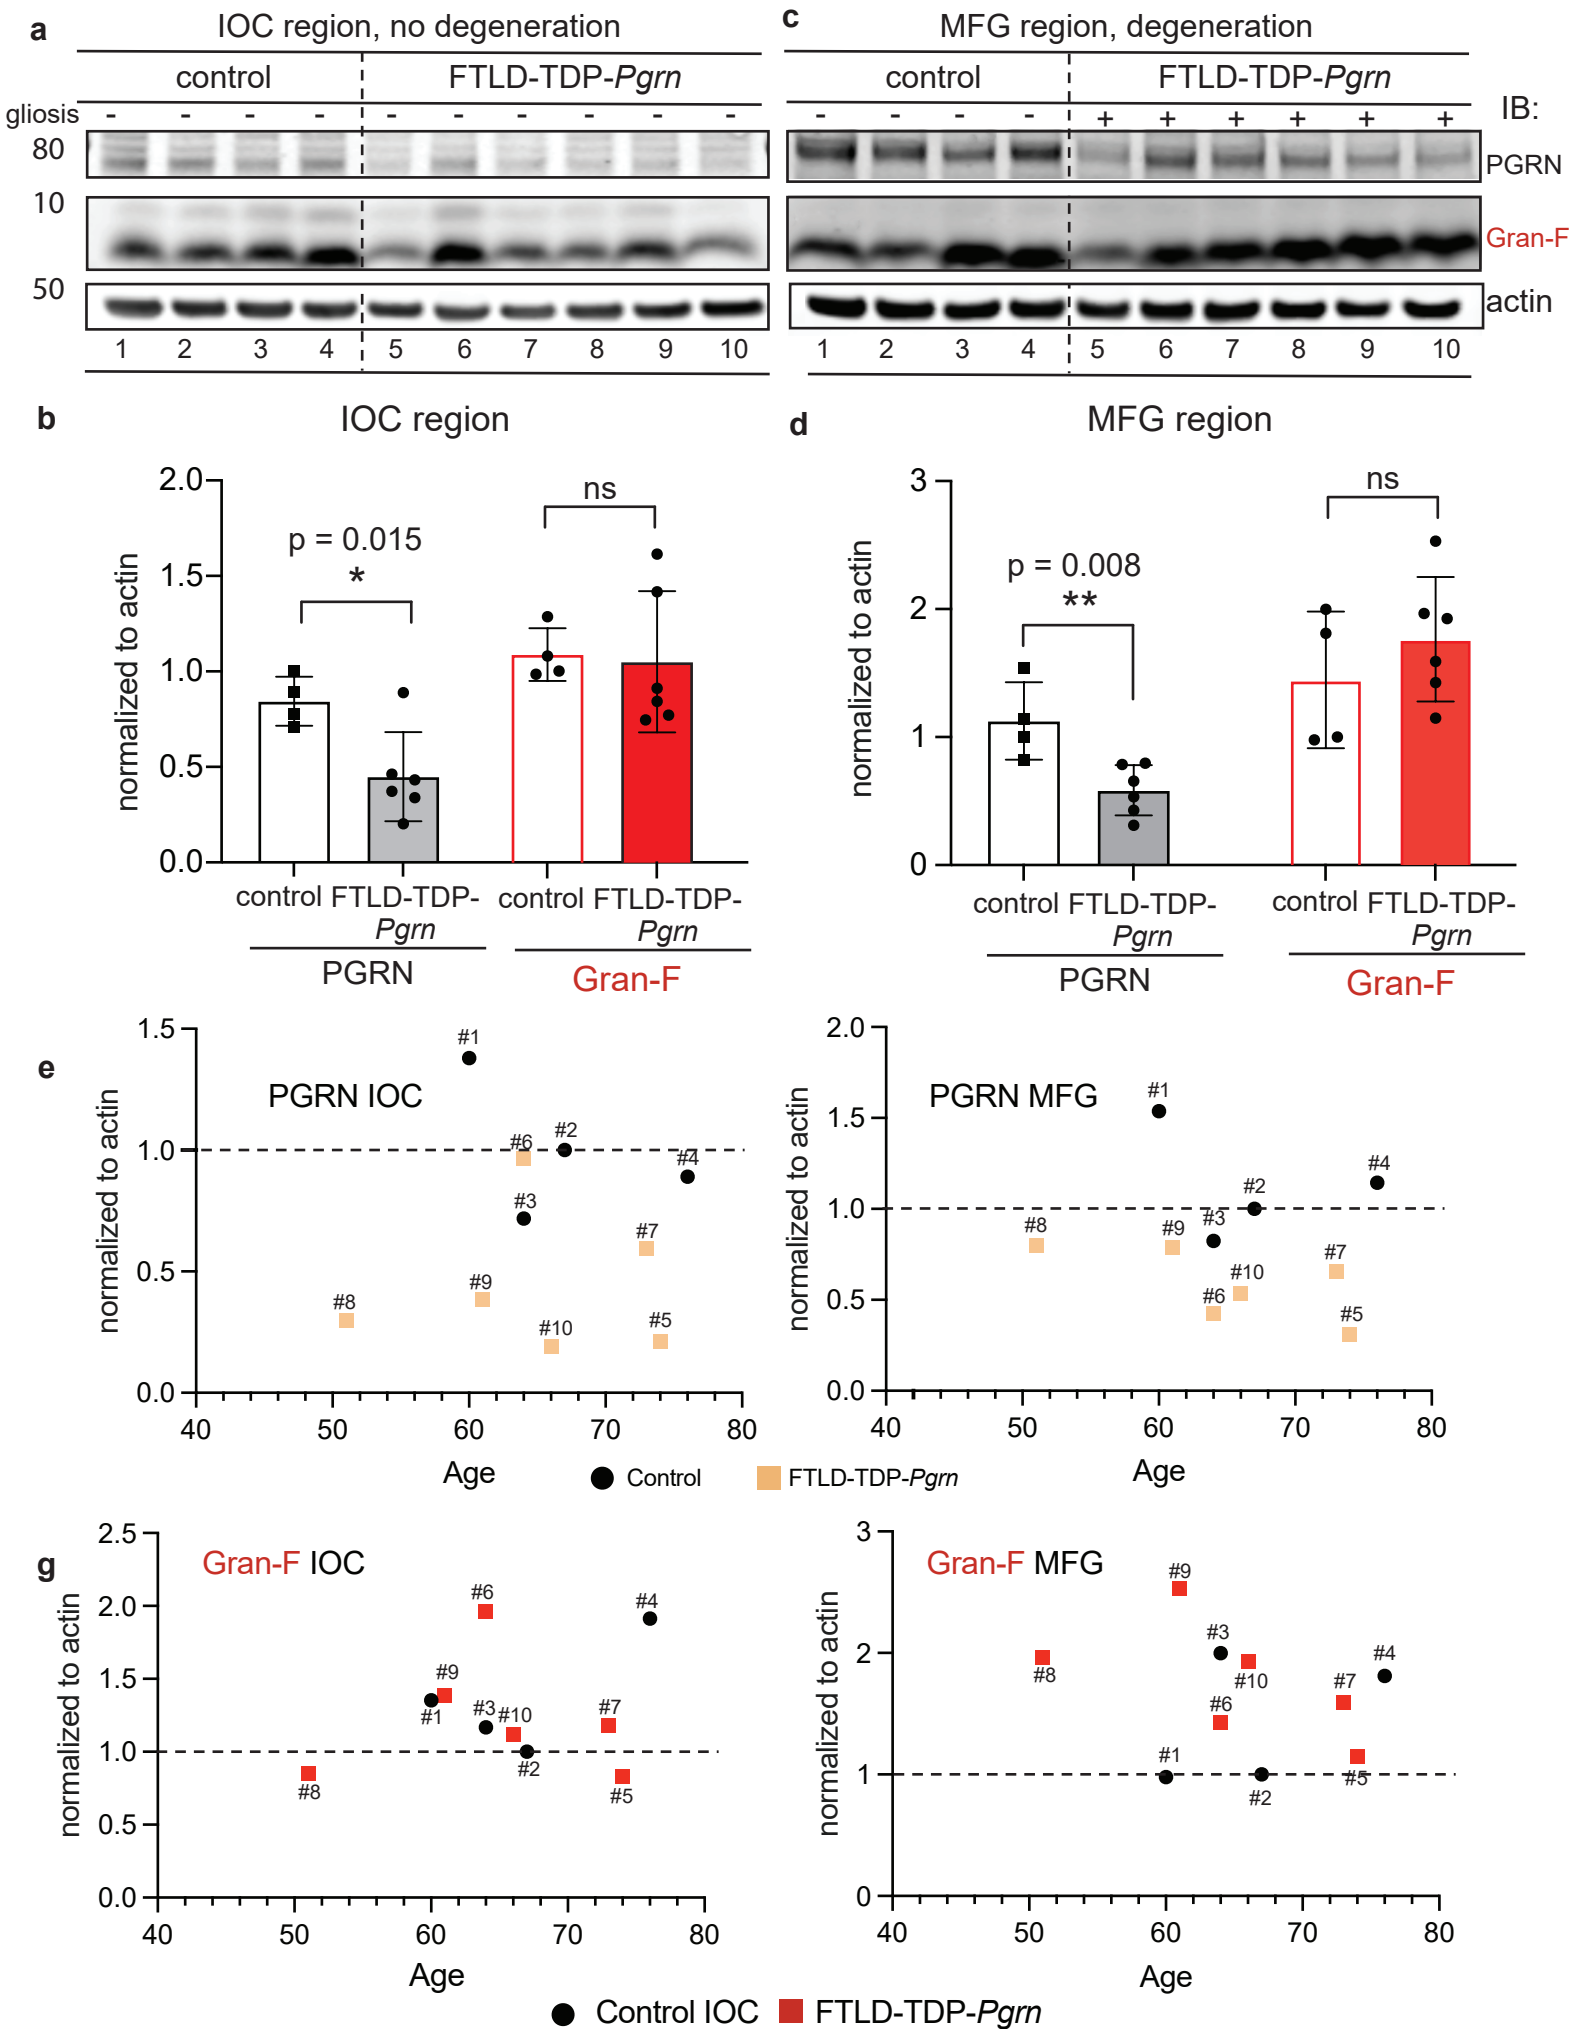

**Figure S11 - Mature AEP levels are significantly increased in degenerating regions of FTLD-TDP-*Pgrn* patients**

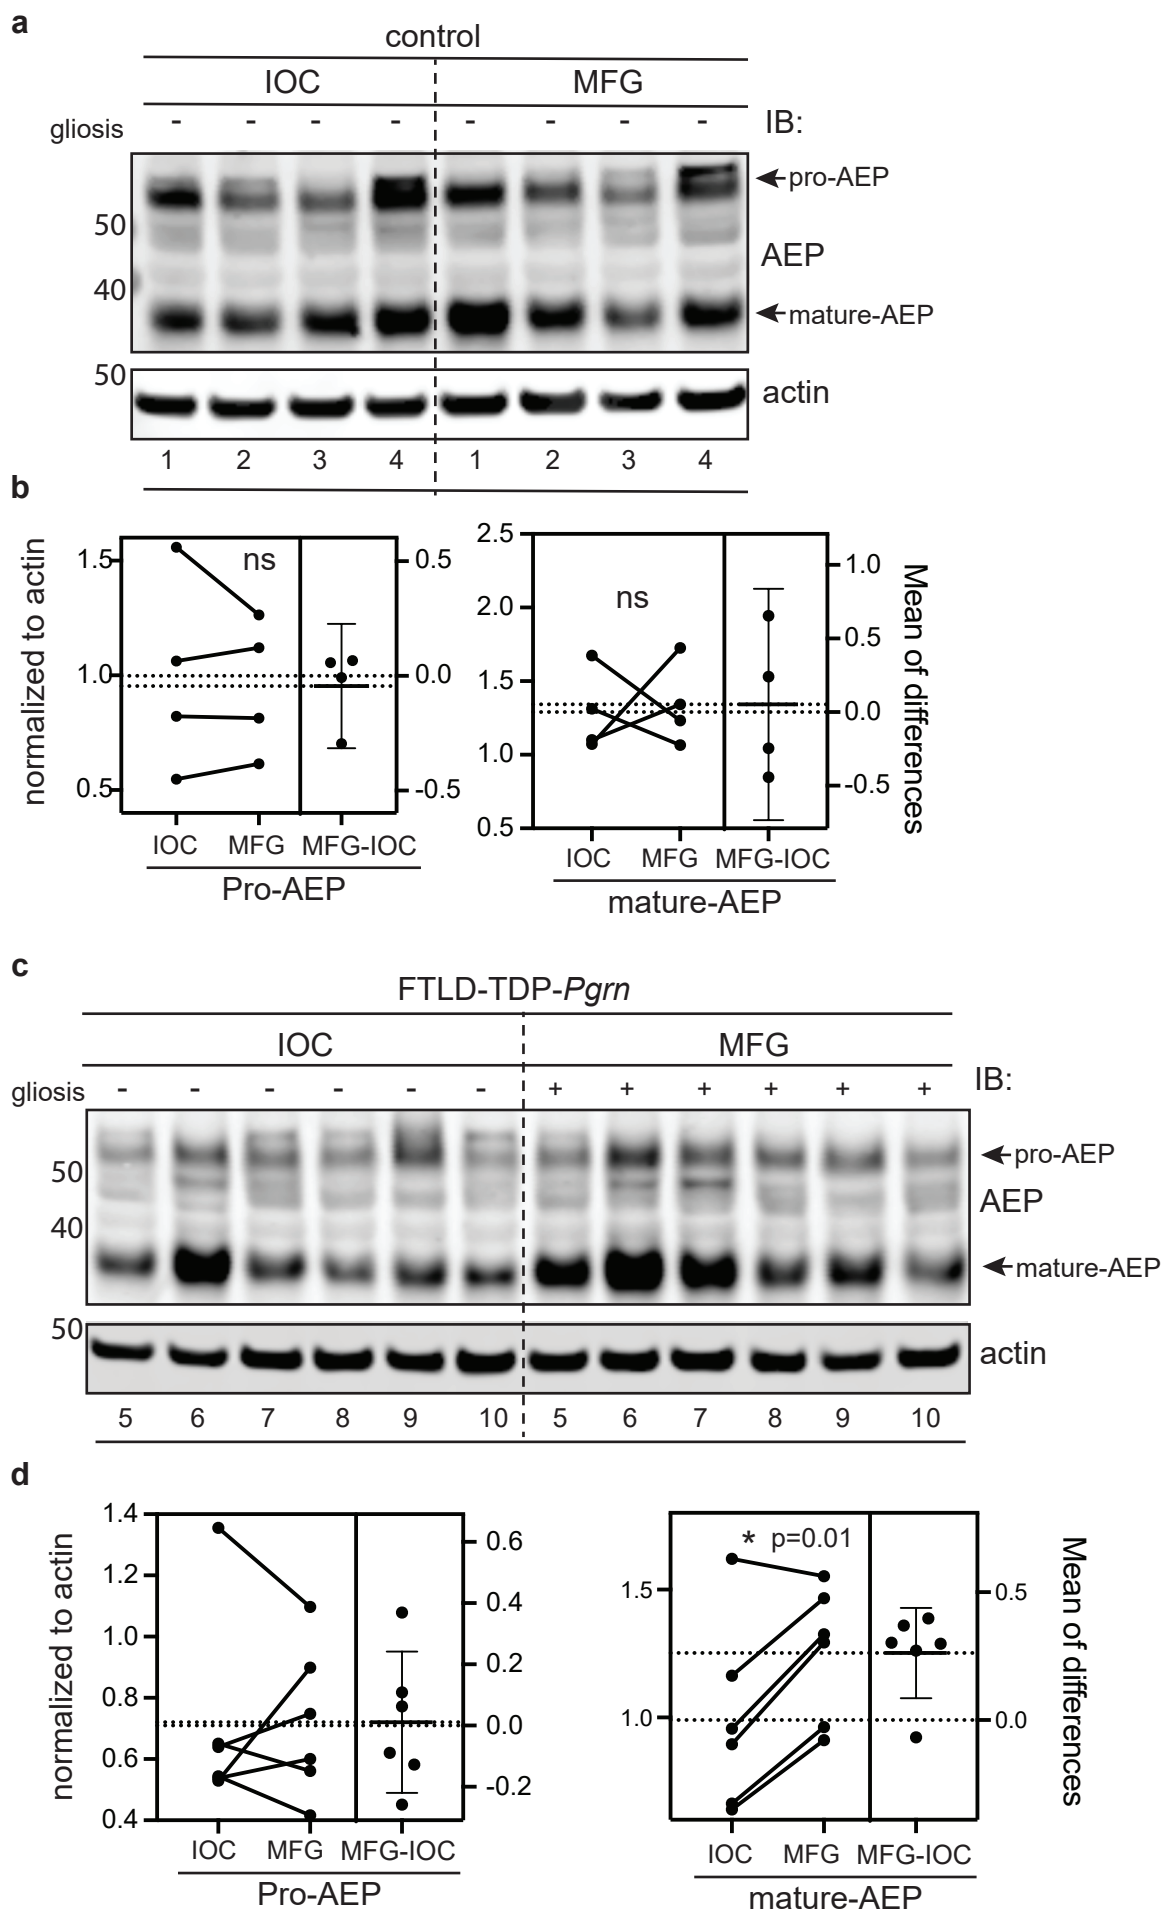

Supplement: 13024_2021_472_MOESM1_ESM.pdf [file 13024_2021_472_MOESM1_ESM.pdf]
